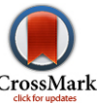

# Efficacy of Ketamine in Improving Pain after Tonsillectomy in Children: Meta-Analysis

Hye Kyung Cho<sup>1</sup>, Kyu Won Kim<sup>1</sup>, Yeon Min Jeong<sup>2</sup>, Ho Seok Lee<sup>2</sup>, Yeon Ji Lee<sup>2</sup>, Se Hwan Hwang<sup>2\*</sup>

**1** Department of Pediatrics, Graduate School of Medicine, Gachon University, Incheon, Korea, **2** Department of Otolaryngology-Head and Neck Surgery, College of Medicine, The Catholic University of Korea, Seoul, Republic of Korea

## Abstract

**Background and objectives:** The goal of this meta-analysis study was to perform a systematic review of the literature on the effects of ketamine on postoperative pain following tonsillectomy and adverse effects in children.

**Subjects and Methods:** Two authors independently searched three databases (MEDLINE, SCOPUS, Cochrane) from their inception of article collection to February 2014. Studies that compared preoperative ketamine administration (ketamine groups) with no treatment (control group) or opioid administration (opioid group) where the outcomes of interest were postoperative pain intensity, rescue analgesic consumption, or adverse effects (sedation, nausea and vomiting, bad dream, worsening sleep pattern, and hallucination) 0–24 hours after leaving the operation room were included in the analysis.

**Results:** The pain score reported by the physician during first 4 hours and need for analgesics during 24 hours postoperatively was significantly decreased in the ketamine group versus control group and was similar with the opioid group. In addition, there was no significant difference between ketamine and control groups for adverse effects during 24 hours postoperatively. In the subgroup analyses (systemic and local administration) regarding pain related measurements, peritonsillar infiltration of ketamine was more effective in reducing the postoperative pain severity and need for analgesics.

**Conclusion:** Preoperative administration of ketamine systemically or locally could provide pain relief without side-effects in children undergoing tonsillectomy. However, considering the insufficient evaluation of efficacy of ketamine according to the administration methods and high heterogeneity in some parameters, further clinical trials with robust research methodology should be conducted to confirm the results of this study.

**Citation:** Cho HK, Kim KW, Jeong YM, Lee HS, Lee YJ, et al. (2014) Efficacy of Ketamine in Improving Pain after Tonsillectomy in Children: Meta-Analysis. PLoS ONE 9(6): e101259. doi:10.1371/journal.pone.0101259

**Editor:** Kenji Hashimoto, Chiba University Center for Forensic Mental Health, Japan

**Received:** April 2, 2014; **Accepted:** June 4, 2014; **Published:** June 30, 2014

**Copyright:** © 2014 Cho et al. This is an open-access article distributed under the terms of the Creative Commons Attribution License, which permits unrestricted use, distribution, and reproduction in any medium, provided the original author and source are credited.

**Data Availability:** The authors confirm that all data underlying the findings are fully available without restriction. All relevant data are within the paper and its Supporting Information files.

**Funding:** This research was supported by the Otorhinolaryngology Alumni Fund of the Catholic University of Korea made in the program year of 2013, the Catholic Medical Center Research Foundation made in the program year of 2013, and the Catholic Medical Center Research Foundation made in the program year of 2014. However, the funders had no role in study design, data collection and analysis, decision to publish, or preparation of the manuscript.

**Competing Interests:** The authors have declared that no competing interests exist.

\* Email: yellobird@catholic.ac.kr

## Introduction

Tonsillectomy continues to be one of the most common otorhinolaryngology surgical procedures for children. Despite advancements in surgical and anesthetic techniques, severe pain and difficulty swallowing are common complaints encountered in children [1,2]. Since pain relief after tonsillectomy can help patients recommence food intake and can prevent patient dehydration secondary to low food intake, various studies have been done to find effective methods of pain management with varying results. Many therapeutic modalities ranging from non-steroidal anti-inflammatory agents (NSAIDs), systemic opioids and local anesthetics have been used in children as effective means for post tonsillectomy pain control [3]. However, systemic opioids may cause respiratory depression, sedation, or nausea and vomiting. In contrast, NSAIDs cause less drowsiness, respiratory depression, and vomiting, but they may interfere with bleeding [4].

Ketamine is an intravenous anesthetic in phencyclidine family, which is a noncompetitive antagonist of N methyl-D-aspartate (NMDA) receptors. Ketamine influences the regulation of central sensitization and opioid resistance [5]. Recent results of several studies in children using ketamine preemptively as an analgesic adjuvant have shown the effects of sub-analgesic doses of ketamine on postoperative pain and opioid consumption. However, others failed to spare morphine for ENT surgery [6]. Therefore, there is currently no sufficient evidence in the literature to fully support the use of ketamine in post-tonsillectomy pain in children. Considering that tonsillectomy continues to be a popular operation and post-tonsillectomy pain is the most common morbidity of tonsillectomy, it is important to ensure that clinicians follow effective practices for decreasing postoperative morbidity. This study assessed the evidence for the efficacy of ketamine for improving the patient experience of tonsillectomy.

## Materials and Methods

### Search strategy and selection of studies

Clinical studies published in English were identified from MEDLINE, SCOPUS, and the Cochrane Register of Controlled Trials up to the cutoff publishing date of February 2013. The following search terms were used: ‘tonsillectomy’, ‘adenotonsillectomy’, ‘ketamine’, ‘pain’, ‘children’, ‘analgesics’, and ‘opioid’. Only studies published in English were selected for inclusion. Reference lists of identified studies were also checked to ensure that no relevant studies were missed.

Two literature reviewers independently screened all abstracts and titles for candidate studies and discarded studies that were not related to the preoperative administration of ketamine. Full text of studies that were potentially relevant to the topic were obtained if a decision for inclusion could not be made from the abstract alone. Criteria for considering studies for this review were: randomized controlled trials of the analgesic effect of any route of ketamine administration on pain after tonsillectomy in children were included. Children (1–16 years of age) undergoing tonsillectomy (cold or thermal) for any indication as inpatient or day case. Studies with more than 10 patients per treatment group were included, which compared the primary outcomes were pain and comfort outcomes (visual analogue scale) compared topical anesthetic spray versus control (no treatment or opioid). Studies compared the analgesic effect on patients receiving the preoperative ketamine with those that used no treatment or opioid. Studies were excluded if, in addition to tonsillectomy, patients underwent additional procedures such as nasal and otologic surgery, or if reports were duplicated. In addition, studies were excluded from the analysis if clinical outcomes of interest were not clearly reported with quantifiable data, or it was not possible to extract and calculate the appropriate data from the published results. However, to include a maximum of appropriate studies, incomplete data were managed by contacting the corresponding author or estimation of the mean and the standard deviation on the basis of the sample size, median, and range according to the method described by Hozo and collaborator [7]. Figure 1 summarizes the search strategy used to identify studies selected for meta-analysis. Lists of excluded full text articles along with the reasons for their exclusion are provided in “File S1”.

### Data extraction and risk of bias assessment

Data from included studies were extracted using standardized forms and independently checked by the two reviewers. Outcomes analyzed were postoperative pain (pain scores after leaving the operation room) [2–5,8–23], postoperative (24 hours) analgesic requirements (either doses or percentage of patient receiving postoperative opioids or nonopioids analgesics)[2–4,8–10,12–14,16,19,20,22–25], time to first analgesic administration (opioid or nonopioid analgesics administered with a defined pain intensity target)[3–5,8–10,12–14,18,22,23,26], time to first oral uptake [2,5,13,14], postoperative nausea and vomiting (percentage of patients or dose of antiemetics) [2,8,9,12–18,24,25] and the occurrence of psycho-mimetic manifestations including nightmares [9,10,18], sleep pattern change (percentage of patients) [9,10,12,19], hallucinations (percentage of patients) [5,8,18,19,25] or sedation (sedation scores) [4,5,8,9,11,15,17,24]. These outcomes were compared with preoperative ketamine group (including intravenous and peritonsillar administration) versus control group (no treatment) or opioid group (patients that used opioids) on postoperative period (0–24 hours after leaving the operation room).

The influence of the administrated ketamine on pain and sedation was separately analyzed through a grading scale after leaving the operation room. The evaluation was usually reported by the physician, with the smallest number being reported as no complaint or alert state, and the greatest number being reported as the severe complaint imaginable or asleep with no response to physical stimuli. From the studies marked for inclusion about the influence of administrated ketamine on postoperative pain and adverse effects, we abstracted data regarding patients number, grading scale used, amounts of analgesics intake, time to first oral intake or analgesics administration, incidences or percentage of adverse effect, and the *p*-value recorded in comparison between preoperative ketamine use [8,9,14–18] versus the control group or opioid group. In the event of missing or incomplete data, attempts were made to request further details of the published results from the authors directly.

The risk of bias for each study was evaluated using the Cochrane ‘Risk of Bias’ tool; the tool assesses the following types of biases: selection bias (random sequence generation and allocation concealment), performance bias (blinding of participants and personnel), detection bias (blinding of outcome assessment), attrition bias (incomplete outcome data), and reporting bias (selective reporting).

### Statistical analysis

The meta-analysis of selected studies was performed with ‘R’ statistical software (R Foundation for Statistical Computing, Vienna, Austria). When original data were expressed as continuous variables, meta-analysis was performed using the standardized mean difference (SMD). This method was chosen to calculate effect sizes due to the absence of a standardized scale used across all studies to assess postoperative pain (OPS, CHEOPS, and FACES score), postoperative analgesic requirements (amounts of postoperative opioid or nonopioid analgesics), time to first analgesic administration and first oral uptake, and postoperative sedation (sedation scores). In all other cases, outcome incidence analysis was performed using the odds ratio (OR) calculated using the Mantel–Haenszel method.

Heterogeneity was calculated with the  $I^2$  test, which describes the rate of variation across studies because of heterogeneity rather than probabilistic chance. The measure ranged from 0 (no heterogeneity) to 100 (maximum heterogeneity). All results were reported with a 95% confidence intervals (CI), and all *p*-values were two-tailed. When significant heterogeneity among outcomes was found (defined as  $I^2 > 50$ ), the random-effects model, according to DerSimonian-Laird, was used. This model assumes that the true treatment effects in individual studies may be different from one another, and that these are normally distributed. In addition, subgroup analysis was performed. Those outcomes that did not present a significant level of heterogeneity ( $I^2 < 50$ ) were analyzed with the fixed-effects model. The fixed-effects model uses the inverse variance approach, and it is assumed that all studies come from a common population. We used a funnel plot and Egger’s test simultaneously to detect potential publication bias and used the Duval and Tweedie’s trim and fill to adjust for missing studies and correct the overall effect size regarding publication bias.<sup>15</sup> Additionally, sensitivity analyses were carried out in order to estimate the influence of each individual study in the meta-analysis results. This was performed by repeating the meta-analyses while omitting a different study each time.

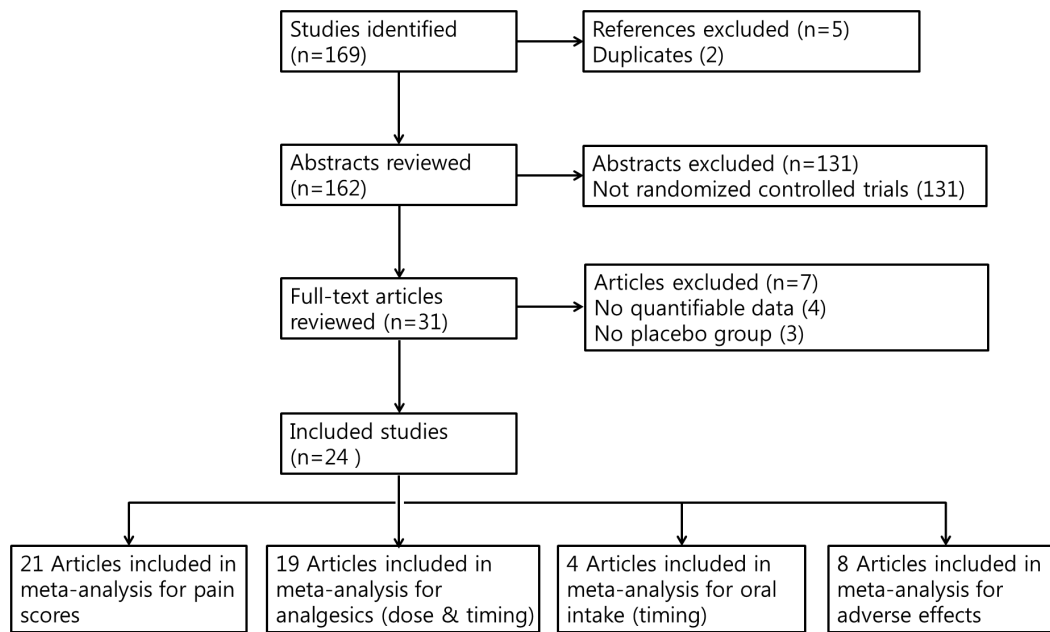

**Figure 1. Diagram of selection of studies.**  
doi:10.1371/journal.pone.0101259.g001

## Results

A total of 24 studies with 1257 participants were included and reviewed for the meta-analysis. The results of bias assessment and study characteristics are described in Table 1.

### Administration of ketamine versus control or opioid (pain)

Postoperative pain at 0 (SMD =  $-1.7085$ ;  $p = 0.0221$ ), 1 (SMD =  $-0.8660$ ;  $p < 0.0001$ ), and 4 hours (SMD =  $-0.7945$ ;  $p < 0.0001$ ) was statistically lower in the ketamine group versus the control group. However, there was no significant difference between both groups in the postoperative pain at 6 (SMD =  $-0.4813$ ;  $p = 0.1347$ ), 12 (SMD =  $-0.5600$ ;  $p = 0.1219$ ), and 24 hours (SMD =  $-0.8864$ ;  $p = 0.1604$ ). Significant inter-study heterogeneity was found at all periods (0~24 hours;  $I^2 > 50\%$ ). Egger's test ( $p < 0.05$ ) at 0 and 1 hours showed some bias source in this sample of studies. However, Duval and Tweedie's trim and fill at all postoperative periods showed no difference between observed and adjusted values. These results showed that the selective studies were not biased (Figure 2).

Results of the overall analysis did not take into account administration routes (intravenous vs peritonsillar). This could be reflected by the high heterogeneity ( $>80\%$ ) of the results obtained by all studies. Consequently, subgroup analyses were indicated. Analysis of ketamine efficacy according to the route of ketamine administration in postoperative periods showed that this factor could not influence analyzed outcomes (Table 2).

There was no significant difference between both groups in the postoperative pain during all postoperative periods: 0 (SMD =  $-0.0516$ ;  $p = 0.6610$ ), 1 (SMD =  $0.0330$ ;  $p = 0.8060$ ), 4 (SMD =  $-0.1912$ ;  $p = 0.2020$ ), 6 (SMD =  $0.8959$ ;  $p = 0.0969$ ), 12 (SMD =  $1.2775$ ;  $p = 0.0638$ ), and 24 hours (SMD =  $0.0000$ ;  $p = 1.0000$ ). A significant inter-study heterogeneity was found at 6 hours ( $I^2 > 50\%$ ). Egger's test ( $p < 0.05$ ) at 1 hour indicated some bias source in this sample of studies. However, Duval and Tweedie's trim and fill at all postoperative periods showed no

difference between observed and adjusted values. These results showed that the selective studies were not biased (Figure 3).

### Administration of ketamine versus control (postoperative analgesic requirements, time to first analgesic administration, and time to first oral uptake)

The incidence of analgesic requirements (LogOR =  $-1.1993$ ;  $p < 0.0001$ ) and amounts of analgesic requirements (SMD =  $-1.3361$ ;  $p < 0.0001$ ) during the 24-hour postoperative period was significantly lower in the ketamine group versus the control group. The time to first analgesic administration (SMD =  $0.9601$ ;  $p = 0.001$ ) was significantly longer in the ketamine group versus the control group. However, the incidence of analgesic requirements on postoperative period (LogOR =  $-0.6850$ ;  $p = 0.0103$ ) was significantly lower in the ketamine group versus the opioid group, but there was no significant difference between the ketamine and opioid groups in the amounts of analgesic requirements during the postoperative period (SMD =  $1.3442$ ;  $p = 0.1791$ ) and time to first analgesic administration (SMD =  $-0.2654$ ;  $p = 0.3847$ ). Significant inter-study heterogeneity was found on the amounts of analgesic requirements and time to first analgesic administration in comparison with control or opioids groups ( $I^2 > 50\%$ ). Egger's test ( $p < 0.05$ ) on the analgesic requirements and time to first analgesic administration in comparison with control groups indicated some bias source in this sample of studies. However, Duval and Tweedie's trim and fill at the amounts of analgesic requirements and time to first analgesic administration showed no difference between observed and adjusted values. These results showed that the selective studies were not biased (Figure 4). In addition, regarding the issue of heterogeneity in the included studies, analysis of ketamine efficacy according to the routes of ketamine administration in postoperative periods showed that this factor could not influence analyzed outcomes (Table 3).

The time to first oral uptake (SMD =  $-0.6382$ ;  $p < 0.0001$ ) was statistically shorter in the ketamine group versus the control group. No significant inter-study heterogeneity ( $I^2 < 50\%$ ) and Egger's test

**Table 1.** Summary of Studies Included in the Meta-analysis.

| Study (year)         | Sample Size | Comparison                                                  | Outcome Measure Analyzed                                                                                                                                                                              | Judgment of Risk of Bias |
|----------------------|-------------|-------------------------------------------------------------|-------------------------------------------------------------------------------------------------------------------------------------------------------------------------------------------------------|--------------------------|
| Aspinall<br>(2001)   | 50          | Preoperative ketamine<br>vs opioids (IV)                    | Time to first analgesia (minutes)                                                                                                                                                                     | low                      |
| Umuroğlu<br>(2004)   | 60          | Preoperative ketamine<br>vs control or opioids (IV)         | Time to first analgesia (minutes)<br>Incidence of analgesic requirements<br>Pain scores (CHEOPS)<br>Adverse effect (sedation score)                                                                   | low                      |
| Hasnain<br>(2012)    | 80          | Preoperative ketamine<br>vs opioids (IV)                    | Time to first analgesia (minutes)<br>Incidence of analgesic requirements<br>Pain scores (CHEOPS)<br>Adverse effect (nausea and vomiting,<br>hallucination, sleep pattern, bad dream)                  | low                      |
| Safavi<br>(2012)     | 60          | Preoperative ketamine<br>vs control (IV)                    | Postoperative analgesic requirements (mg)<br>Postoperative antiemetic requirement (mg)                                                                                                                | low                      |
| Honarmand<br>(2013)  | 60          | Preoperative ketamine<br>vs control (IV)                    | Time to first analgesia (hours)<br>The time to first oral intake (min)<br>Pain scores (CHEOPS)<br>Postoperative analgesic requirement (mg)<br>Adverse effect (sedation score, nausea and<br>vomiting) | unclear risk             |
| Taheri<br>(2011)     | 60          | Preoperative ketamine<br>vs opioids (IV)                    | Time to first analgesia (min)<br>Incidence of analgesic requirements<br>Postoperative analgesic requirement (mg)<br>Pain scores (OPS)<br>Adverse effect (sedation score)                              | low                      |
| Marcus<br>(2000)     | 78          | Preoperative ketamine<br>vs opioids (IV)                    | Time to first analgesia (min)<br>Incidence of analgesic requirements<br>Adverse effect (sedation score, nausea and<br>vomiting, bad dream, sleep pattern)<br>Pain scores (CHEOPS)                     | low                      |
| Ayatollahi<br>(2012) | 126         | Preoperative ketamine<br>vs control or opioids<br>(topical) | Pain scores (CHEOPS)<br>Time to first analgesia (hours)<br>The time to first oral intake<br>Adverse effect (sedation score,<br>hallucination)                                                         | low                      |
| Teklioglu<br>(2013)  | 60          | Preoperative ketamine<br>vs control or opioids<br>(topical) | Pain score (Face score)<br>Adverse effect (sedation score)                                                                                                                                            | low                      |
| O'Flaherty<br>(2003) | 39          | Preoperative ketamine<br>vs control (IV)                    | Pain score (CHEOPS)<br>Postoperative analgesic requirement (mg)<br>Adverse effect (sedation scores,<br>hallucination, sleep pattern)                                                                  | unclear risk             |
| Batra<br>(2007)      | 40          | Preoperative ketamine<br>vs control (IV)                    | Time to first analgesia (hours)<br>Postoperative analgesic requirement (mg)<br>Pain score (CHEOPS)<br>Adverse effect (nausea and vomiting, sleep<br>pattern)                                          | low                      |
| Khademi<br>(2010)    | 38          | Preoperative ketamine<br>vs control (IV or topical)         | Incidence of analgesic requirements<br>Time to first analgesia (hours)<br>The time to first oral intake (hours)<br>Adverse effect (nausea and vomiting)                                               | low                      |

**Table 1. Cont.**

| Study (year)         | Sample Size | Comparison                                                  | Outcome Measure Analyzed                                                                        | Judgment of Risk of Bias |
|----------------------|-------------|-------------------------------------------------------------|-------------------------------------------------------------------------------------------------|--------------------------|
| Levänen<br>(2000)    | 40          | Preoperative ketamine<br>vs opioids (IV)                    | Pain score (Face score)                                                                         | low                      |
|                      |             |                                                             | Pain score (Face score)                                                                         |                          |
|                      |             |                                                             | Postoperative analgesic requirement                                                             |                          |
|                      |             |                                                             | Adverse effect (sedation score, nausea and vomiting, sleep pattern)                             |                          |
| Elshamma<br>(2011)   | 30          | Preoperative ketamine<br>vs opioids (IV)                    | Pain score (VAS)                                                                                | low                      |
|                      |             |                                                             | Adverse effect (sedation score, nausea and vomiting, sleep pattern)                             |                          |
|                      |             |                                                             |                                                                                                 |                          |
| Erhan<br>(2007)      | 60          | Preoperative ketamine<br>vs control (topical)               | Time to first analgesia (hours)                                                                 | low                      |
|                      |             |                                                             | Postoperative analgesic requirement (mg)                                                        |                          |
|                      |             |                                                             | Pain score (CHEOPS)                                                                             |                          |
|                      |             |                                                             | Adverse effect (hallucination)                                                                  |                          |
| Elhakim<br>(2003)    | 50          | Preoperative ketamine<br>vs control (IV)                    | Time to first analgesia (hours)                                                                 | low                      |
|                      |             |                                                             | Postoperative analgesic requirement (mg)                                                        |                          |
|                      |             |                                                             | Pain score (CHEOPS)                                                                             |                          |
|                      |             |                                                             | The time to first oral intake (hours)                                                           |                          |
|                      |             |                                                             | Adverse effect (nausea and vomiting, hallucination, sleep pattern, time to ke)                  |                          |
| Ugur<br>(2013)       | 75          | Preoperative ketamine<br>vs control or opioids<br>(topical) | Pain score (CHEOPS)                                                                             | low                      |
|                      |             |                                                             | Postoperative sedation scores                                                                   |                          |
|                      |             |                                                             | Adverse effect (nausea and vomiting)                                                            |                          |
| Pirzadeh<br>(2012)   | 60          | Preoperative ketamine<br>vs control (topical)               | Pain score (CHEOPS)                                                                             | low                      |
|                      |             |                                                             | Adverse effect (sedation scores, nausea and vomiting)                                           |                          |
| Dal<br>(2007)        | 120         | Preoperative ketamine<br>vs control (IV)                    | Incidence of analgesic requirements                                                             | low                      |
|                      |             |                                                             | Time to first analgesia (hours)                                                                 |                          |
|                      |             |                                                             | Pain score (OPS)                                                                                |                          |
|                      |             |                                                             | Adverse effect (sedation scores, nausea and vomiting, time to awake, bad dreams, sleep pattern) |                          |
| Honarmand<br>(2008)  | 50          | Preoperative ketamine<br>vs control (topical)               | Pain score (CHEOPS)                                                                             | unclear risk             |
|                      |             |                                                             | Time to first analgesia (hours)                                                                 |                          |
|                      |             |                                                             | Postoperative analgesic requirement (mg)                                                        |                          |
|                      |             |                                                             | Adverse effect (nausea and vomiting, hallucination)                                             |                          |
| Canbay<br>(2008)     | 45          | Preoperative ketamine<br>vs control or opioids<br>(topical) | Pain score (CHEOPS)                                                                             | low                      |
|                      |             |                                                             | Time to first analgesia (hours)                                                                 |                          |
|                      |             |                                                             | Postoperative analgesic requirement (mg)                                                        |                          |
|                      |             |                                                             | Adverse effect (sleep pattern, bad dreams)                                                      |                          |
| Eghbal<br>(2013)     | 66          | Preoperative ketamine<br>vs control (IV)                    | Pain score (Face score)                                                                         | low                      |
|                      |             |                                                             | Postoperative analgesic requirement (mg)                                                        |                          |
|                      |             |                                                             | Adverse effect (nausea and vomiting)                                                            |                          |
| El Sonbaty<br>(2011) | 50          | Preoperative ketamine<br>vs opioids (topical)               | Pain score (OPS)                                                                                | low                      |
|                      |             |                                                             |                                                                                                 |                          |
| Siddiqui<br>(2013)   | 50          | Preoperative ketamine<br>vs control (topical)               | Pain score (CHEOPS)                                                                             | low                      |
|                      |             |                                                             | Time to first analgesia (hours)                                                                 |                          |
|                      |             |                                                             | Adverse effect (nausea and vomiting, bad dreams, hallucination)                                 |                          |

doi:10.1371/journal.pone.0101259.t001

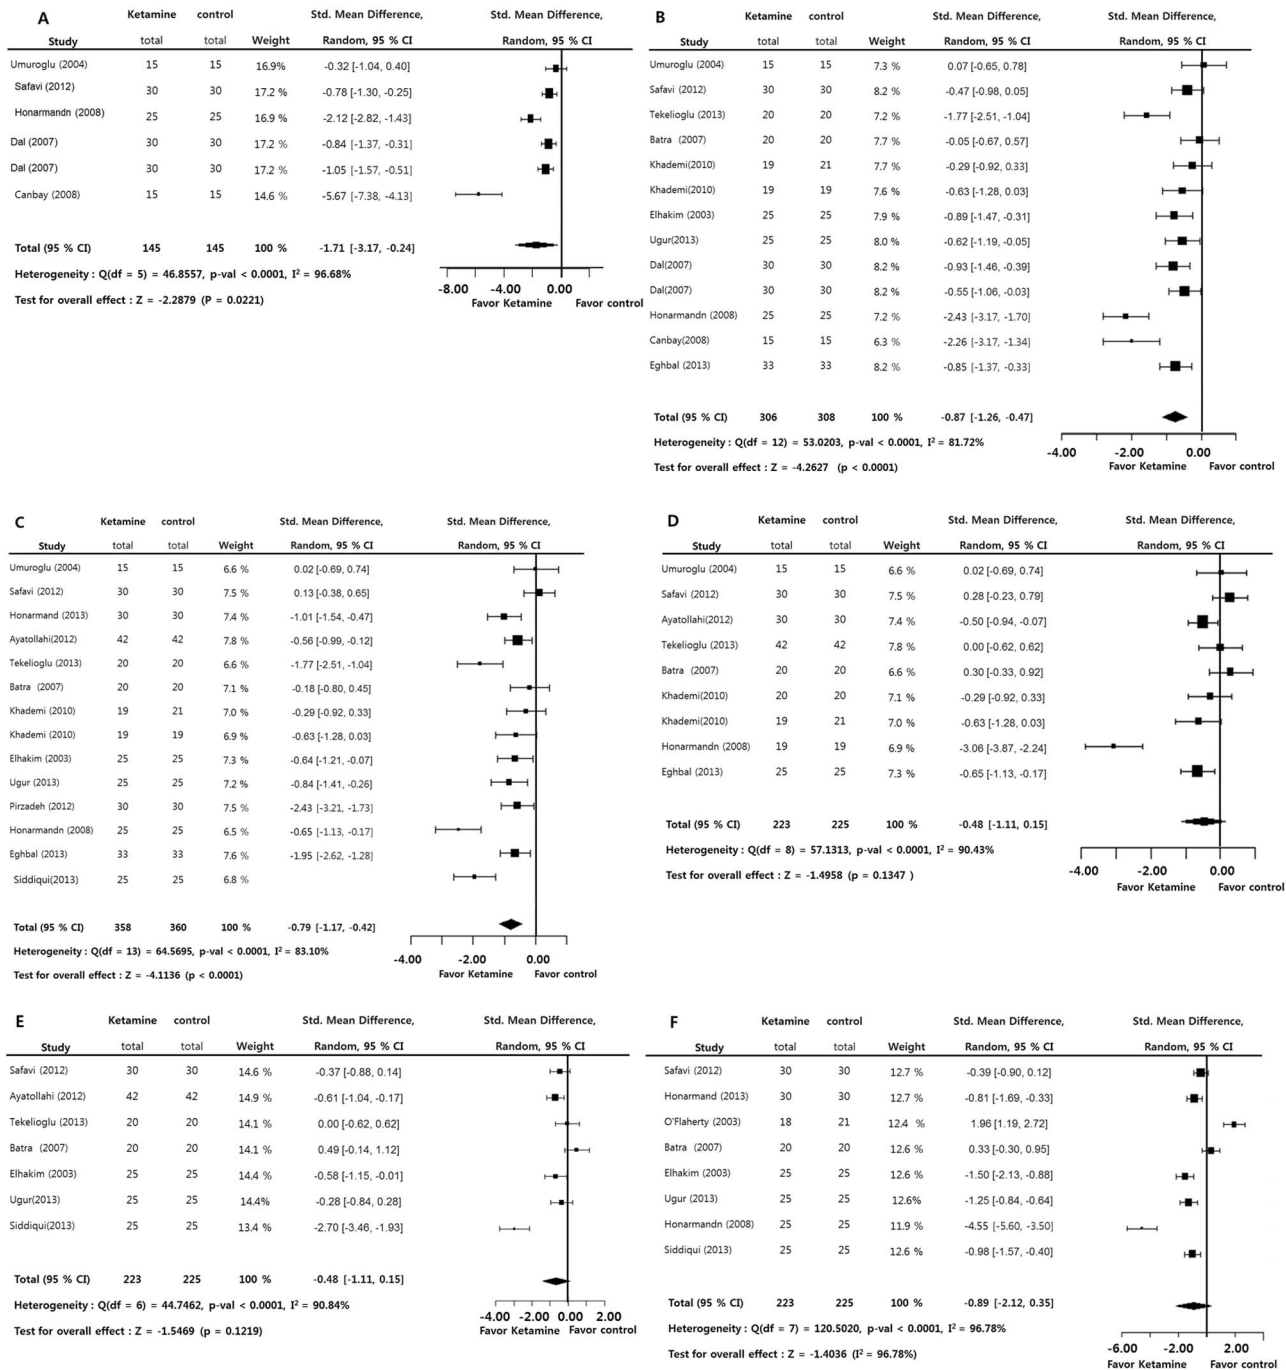

**Figure 2. Preoperative ketamine versus control.** Standard mean difference of pain at 0 (A), 1 (B), 4 (C), 6 (D), 12 (E), and 24 hours (F) from leaving operation room (total : number of participants per group). doi:10.1371/journal.pone.0101259.g002

( $p > 0.05$ ) on this measurement suggested that a bias source was not evident in this sample of studies. There was no statistically significant difference between the ketamine group and opioid group in this measurements (SMD = 0.4573;  $p = 0.3094$ ). Although significant inter-study heterogeneity ( $I^2 > 50\%$ ) was found in this measurement, Egger's test was not measured because of the small sample size enrolled in the studies (Figure 4).

### Administration of ketamine versus control (adverse effect)

The incidence of postoperative nausea and vomiting (Lo-gOR = 0.3253;  $p = 0.0432$ ) and amounts of antiemetics requirements (SMD = -1.1611;  $p = 0.0013$ ) during the 24-hour postoperative period was significantly lower in the ketamine group versus the control group. A significant inter-study heterogeneity approximately was not found on these measurements ( $I^2 < 50\%$ ). Egger's

**Table 2.** Subgroup analysis of the effects of administration routes of ketamine on the postoperative pain.

|                                     | Effect size                   |                               |                               |                         |                         |                         |
|-------------------------------------|-------------------------------|-------------------------------|-------------------------------|-------------------------|-------------------------|-------------------------|
|                                     | 0 hours                       | 1 hours                       | 4 hours                       | 6 hours                 | 12 hours                | 24 hours                |
| <b>Overall results</b>              | -1.71                         | -0.87                         | -0.79                         | -0.48                   | -0.48                   | -0.89                   |
| <b>(pain score)</b>                 | [-3.17, -0.24]                | [-1.26, -0.47]                | [-1.17, -0.42]                | [-1.11, 0.15]           | [-1.11, 0.15]           | [-2.12, 0.35]           |
|                                     | <b>I<sup>2</sup> = 96.68%</b> | <b>I<sup>2</sup> = 81.72%</b> | <b>I<sup>2</sup> = 83.10%</b> | I <sup>2</sup> = 90.43% | I <sup>2</sup> = 90.84% | I <sup>2</sup> = 96.78% |
|                                     | <b>p = 0.0221</b>             | <b>p &lt; 0.0001</b>          | <b>p &lt; 0.0001</b>          | p = 0.1347              | p = 0.1219              | p = 1.0000              |
| <b>Intravenous administration</b>   | -0.80                         | -0.52                         | -0.39                         | -0.08                   | -0.17                   | -0.11                   |
| <b>(pain score)</b>                 | [-1.08, -0.52]                | [-0.81, -0.23]                | [-0.71, -0.08]                | [-0.47, 0.31]           | [-0.79, 0.45]           | [-1.25, 1.03]           |
|                                     | <b>I<sup>2</sup> = 0.00%</b>  | <b>I<sup>2</sup> = 42.75%</b> | <b>I<sup>2</sup> = 52.97%</b> | I <sup>2</sup> = 55.43% | I <sup>2</sup> = 72.06% | I <sup>2</sup> = 94.51% |
|                                     | <b>p &lt; 0.0001</b>          | <b>p = 0.0004</b>             | <b>p = 0.0146</b>             | p = 0.6720              | p = 0.5900              | p = 0.8506              |
| <b>Peritonsillar administration</b> | -2.88                         | -1.34                         | -1.22                         | -1.02                   | -0.87                   | -2.22                   |
| <b>(pain score)</b>                 | [-5.58, -0.18]                | [-2.04, -0.64]                | [-1.80, -0.65]                | [-2.33, 0.29]           | [-2.04, 0.29]           | [-4.44, 0.01]           |
|                                     | <b>I<sup>2</sup> = 97.04%</b> | <b>I<sup>2</sup> = 85.00%</b> | <b>I<sup>2</sup> = 84.54%</b> | I <sup>2</sup> = 94.58% | I <sup>2</sup> = 93.89% | I <sup>2</sup> = 96.56% |
|                                     | <b>p = 0.0369</b>             | <b>p = 0.0002</b>             | <b>p &lt; 0.0001</b>          | p = 0.1255              | p = 0.1423              | p = 0.0500              |

doi:10.1371/journal.pone.0101259.t002

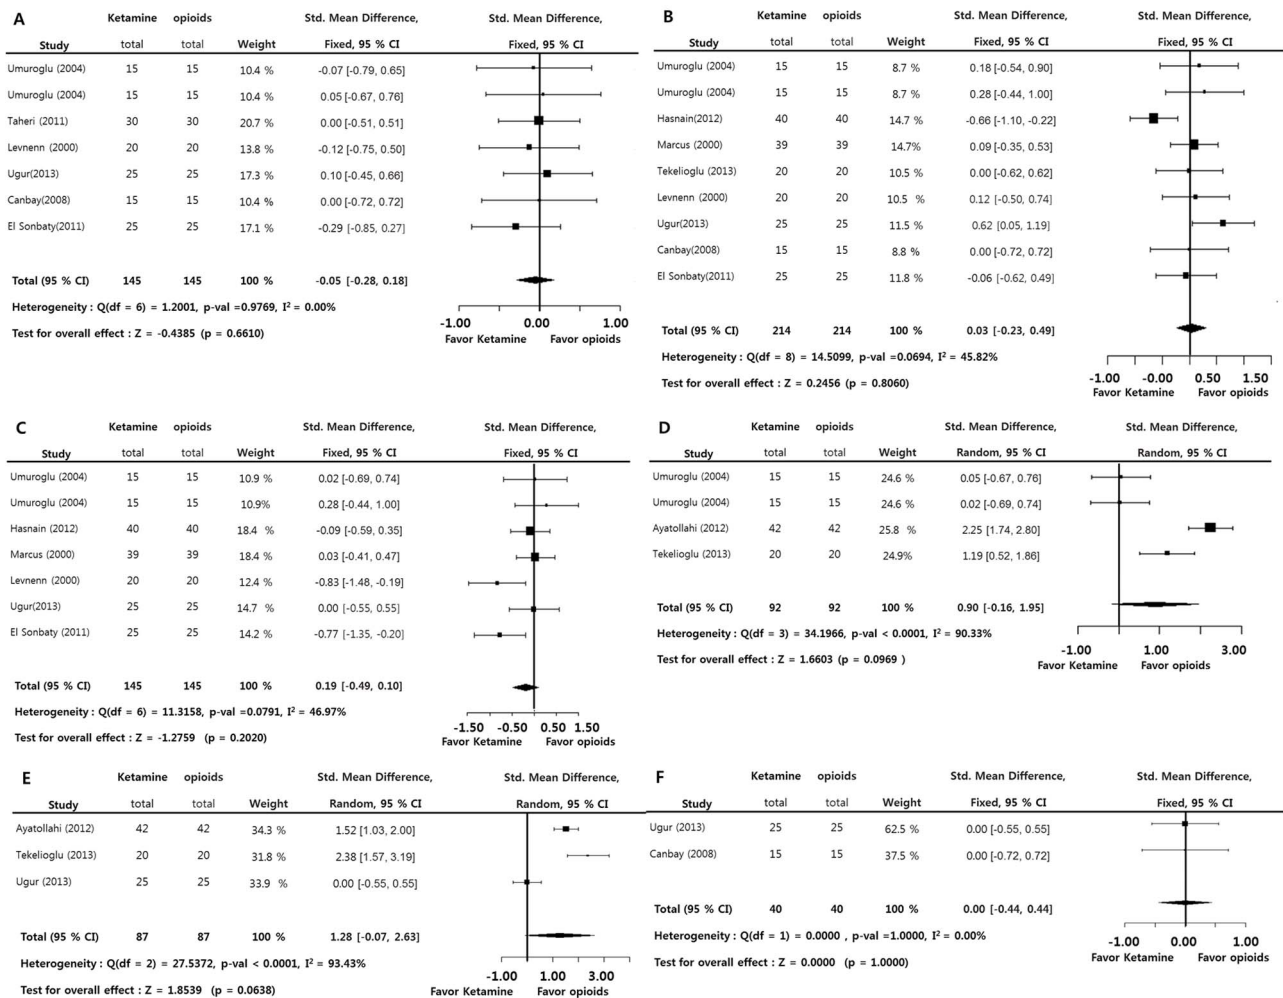

**Figure 3. Preoperative ketamine versus opioids.** Standard mean difference of pain at 0 (A), 1 (B), 4 (C), 6 (D), 12 (E), and 24 hours (F) from leaving operation room (total : number of participants per group). doi:10.1371/journal.pone.0101259.g003

**Table 3.** Subgroup analysis of the effects of administration routes of ketamine on the consumption of analgesics.

|                                                             | Effect size                                          |
|-------------------------------------------------------------|------------------------------------------------------|
| <b>Overall results (Amount of analgesic control)</b>        | -1.34 [-2.00, -0.67], $I^2 = 90.39\%$ , $p < 0.0001$ |
| intravenous administration                                  | -1.32 [-2.44, -0.20], $I^2 = 94.31\%$ , $p = 0.0210$ |
| Peritonsillar administration                                | -1.32 [-2.78, -1.23], $I^2 = 47.48\%$ , $p < 0.0001$ |
| <b>Overall results (Time to analgesic uptake (control))</b> | 0.96 [0.39, 1.53], $I^2 = 89.37\%$ , $p = 0.0054$    |
| intravenous administration                                  | 0.69 [0.21-1.17], $I^2 = 66.33\%$ , $P = 0.0048$     |
| Peritonsillar administration                                | 1.22 [0.23-2.22], $I^2 = 93.59\%$ , $P = 0.0160$     |
| <b>Overall results (Time to analgesic uptake (opioids))</b> | -0.27 [-0.86, 0.33], $I^2 = 89.05\%$ , $p = 0.3847$  |
| intravenous administration                                  | -0.17 [-0.81, 0.47], $I^2 = 87.40\%$ , $p = 0.6005$  |
| Peritonsillar administration                                | -0.51 [-2.34, 1.31], $I^2 = 94.37\%$ , $p = 0.5809$  |

doi:10.1371/journal.pone.0101259.t003

test ( $p > 0.05$ ) on these measurements suggested that a bias source was not evident in this sample of studies (Figure 5).

Although the time to awake (post anesthesia recovery;  $SMD = 0.3253$ ;  $p = 0.0357$ ) was significantly longer in the ketamine group versus the control group, the degree of sedation during the 12-hour postoperative period (0 ( $SMD = 0.1553$ ;  $p = 0.2687$ ), 1 ( $SMD = 0.0801$ ;  $p = 0.4220$ ), 4 ( $SMD = 0.3842$ ;  $p = 0.1227$ ), 6 ( $SMD = 0.0945$ ;  $p = 0.6200$ ), and 12 hours ( $SMD = 0.0923$ ;  $p = 0.5987$ )) was not significantly larger in the ketamine group versus the control group. A significant inter-study heterogeneity approximately was not found on these measurements ( $I^2 < 50\%$ ). Egger's test ( $p > 0.05$ ) on these measurements suggested that a bias source was not evident in this sample of studies (Figure 6).

Regarding the adverse psycho-mimetic effect, the incidence of worse sleep pattern change ( $SMD = -0.4144$ ;  $p = 0.4986$ ), bad dreams ( $SMD = 0.2885$ ;  $p = 0.3658$ ), and hallucination ( $SMD = 0.7374$ ;  $p = 0.3795$ ) showed no significant difference in the ketamine group versus the control group. Significant inter-study heterogeneity approximately was not found on these measurements ( $I^2 < 50\%$ ). Egger's test ( $p < 0.05$ ) on sleep pattern change in comparison with control groups suggested that some bias source was evidenced in this sample of studies. However, Duval and Tweedie's trim and fill at these measurements showed there was no difference between observed and adjusted values. Therefore, these results showed that the selective studies were not biased (Figure 7).

### Sensitivity analyses

Sensitivity analyses were performed to evaluate whether the pooled estimates of postoperative pain, postoperative analgesic requirements, time to first analgesic administration, time to first oral uptake, and adverse effect were different by omitting a different study each time and repeating the meta-analyses. Finally, the results were all consistent with the above outcomes.

### Discussion

Post-tonsillectomy pain is one of the universal complaints of the patients and remains a considerable clinical problem. In particular, the intense pain itself can have an adverse effect both on the heart rate and blood pressure of the patient. The pain which the body senses acting via the sympathetic autonomous nervous system may increase the heart rate, and blood pressure [15]. Both of these effects causes a high cardiac output, which leads to postoperative exhaustion of the patient [27]. Therefore, pain

assessment and control after tonsillectomy must be included in the routine post-tonsillectomy management of the patients.

The choice of the pain scoring system in children has great importance because the assessment of pain in children is difficult as their cognitive and communicative skills to report pain are underdeveloped. In previous studies [4,28], several scoring systems (OPS, CHEOPS, and pediatric behavioral FLACC pain scale as three examples) were used to assess pain by the clinicians to obtain more reliable results. These systems depend on the behavioural expression and/or verbal expression, and are sensitive for this population and validated measures of pain for children [4]. In addition, the frequency or amount of analgesics used following tonsillectomy used to be adopted as an objective criterion for assessment of pain [29]. This study attempted to assess the extent of pain via the observational pain scale as well as the frequency or amount of analgesics used.

There are several systematic reviews related to pediatric tonsillectomy. First one by Hamunen et al. [30] examining opioids, NSAIDs and paracetamol for reducing pain following tonsillectomy and the others by Laskowski et al. [31] and Dahmani et al. [32] on ketamine for improving pain after tonsillectomy in children. Hamunen et al. reported that no analgesic in single prophylactic dose was enough to provide analgesia during the day of operation thus repeated administration was needed to guarantee freedom from pain. Combination of regularly administered mild analgesics and individually titrated opioids were needed to reach optimal result. However, they had major limitations that there were no review on adverse effects following analgesics and no data to show which analgesic and dose from each class of analgesics to choose.

There have been a number of investigations into the efficacy of ketamine in reducing postoperative pain, along with different routes (systemically or locally) with their various doses and schedules. Laskowski et al. suggested that intravenous ketamine is effective in reducing total opioid requirements and delaying the time to first analgesic dose in painful procedures, including upper abdominal, thoracic, and major orthopedic surgeries, while no significant benefit was found in those patients undergoing tonsillectomy. However, there were only four studies regarding pediatric tonsillectomy in all enrolled 47 studies [31]. Therefore, their results could not to reach a stronger conclusion regarding the efficacy of ketamine on post-tonsillectomy pain in children. By contrast, Dahmani et al. conducted to pool data from many studies regarding pediatric tonsillectomy and reached more stronger conclusion regarding the efficacy of ketamine on tonsillectomy in children [32]. However, there were several



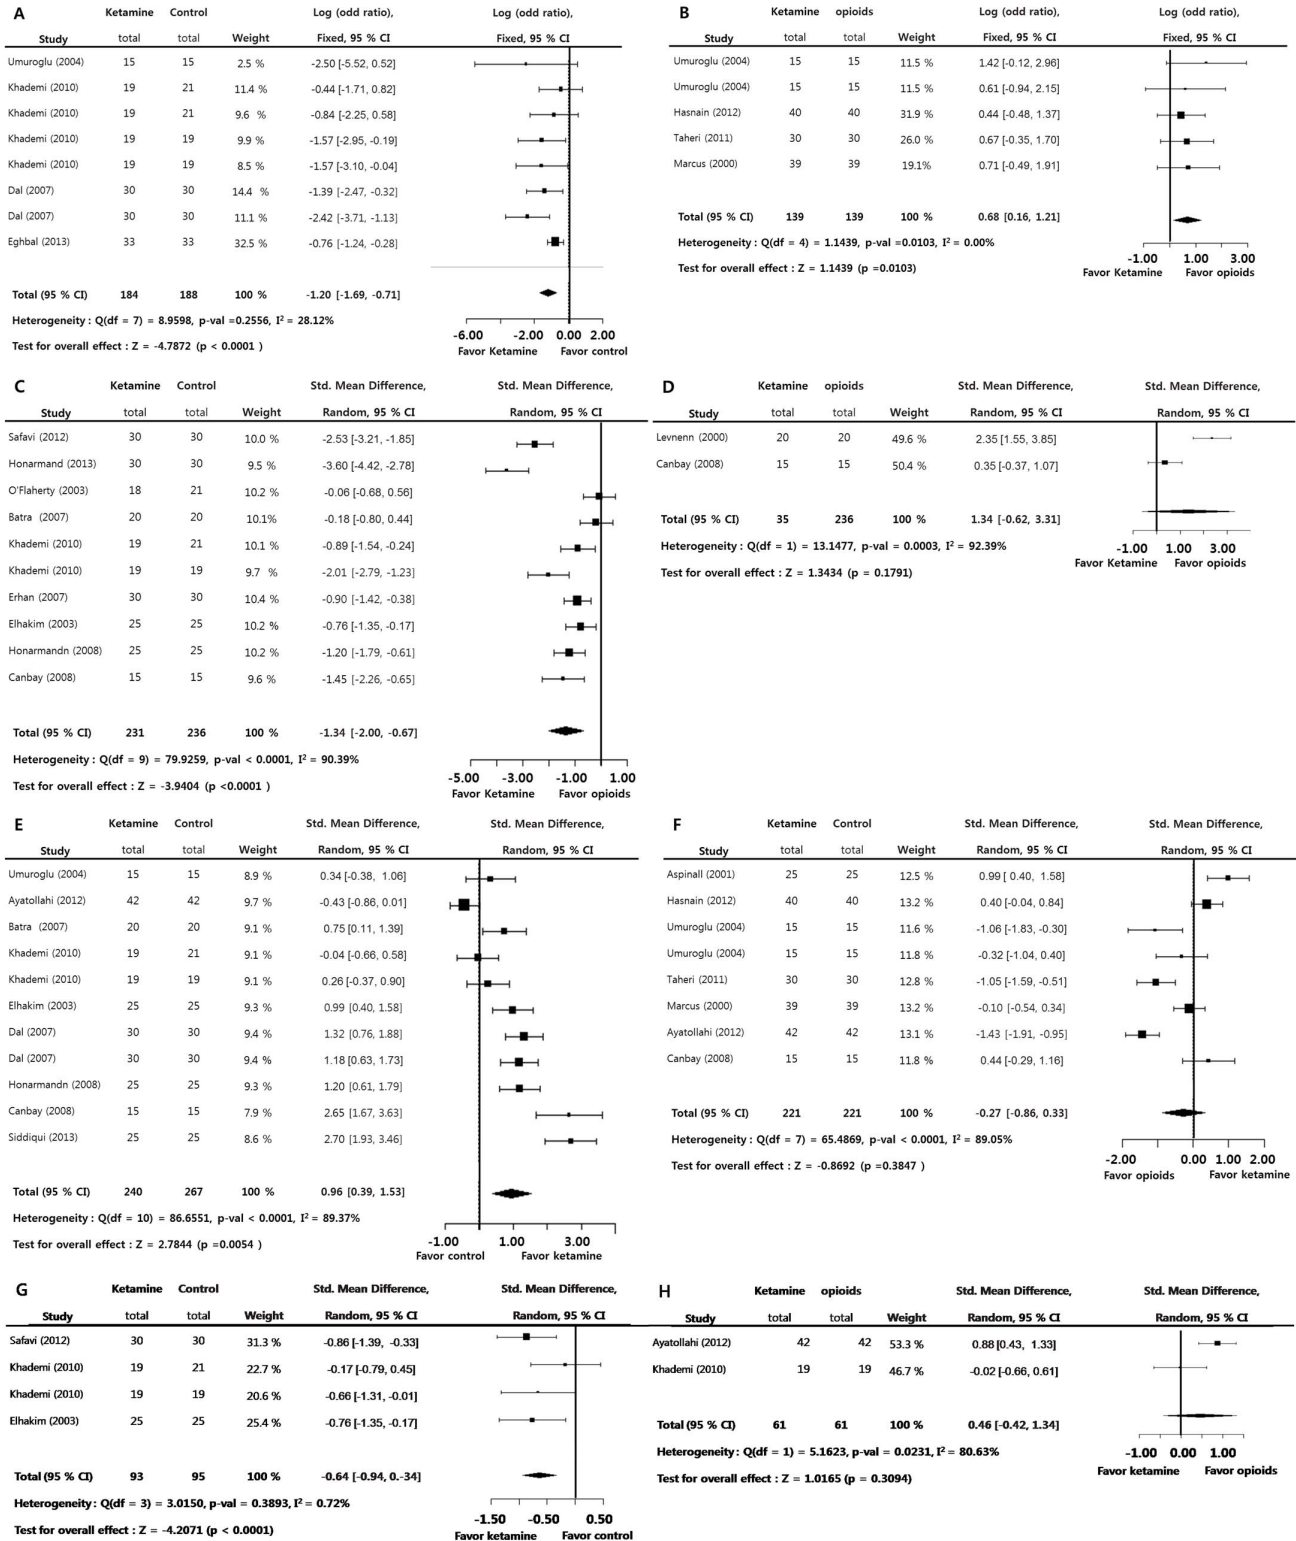

**Figure 4. Preoperative ketamine versus control or opioids.** Odd ratio of the incidence of analgesic requirements (A, B), standard mean difference of amounts of analgesic requirements (C, D), time to first analgesic administration (E, F), and time of first oral intake (G, H) (total : number of participants per group). doi:10.1371/journal.pone.0101259.g004

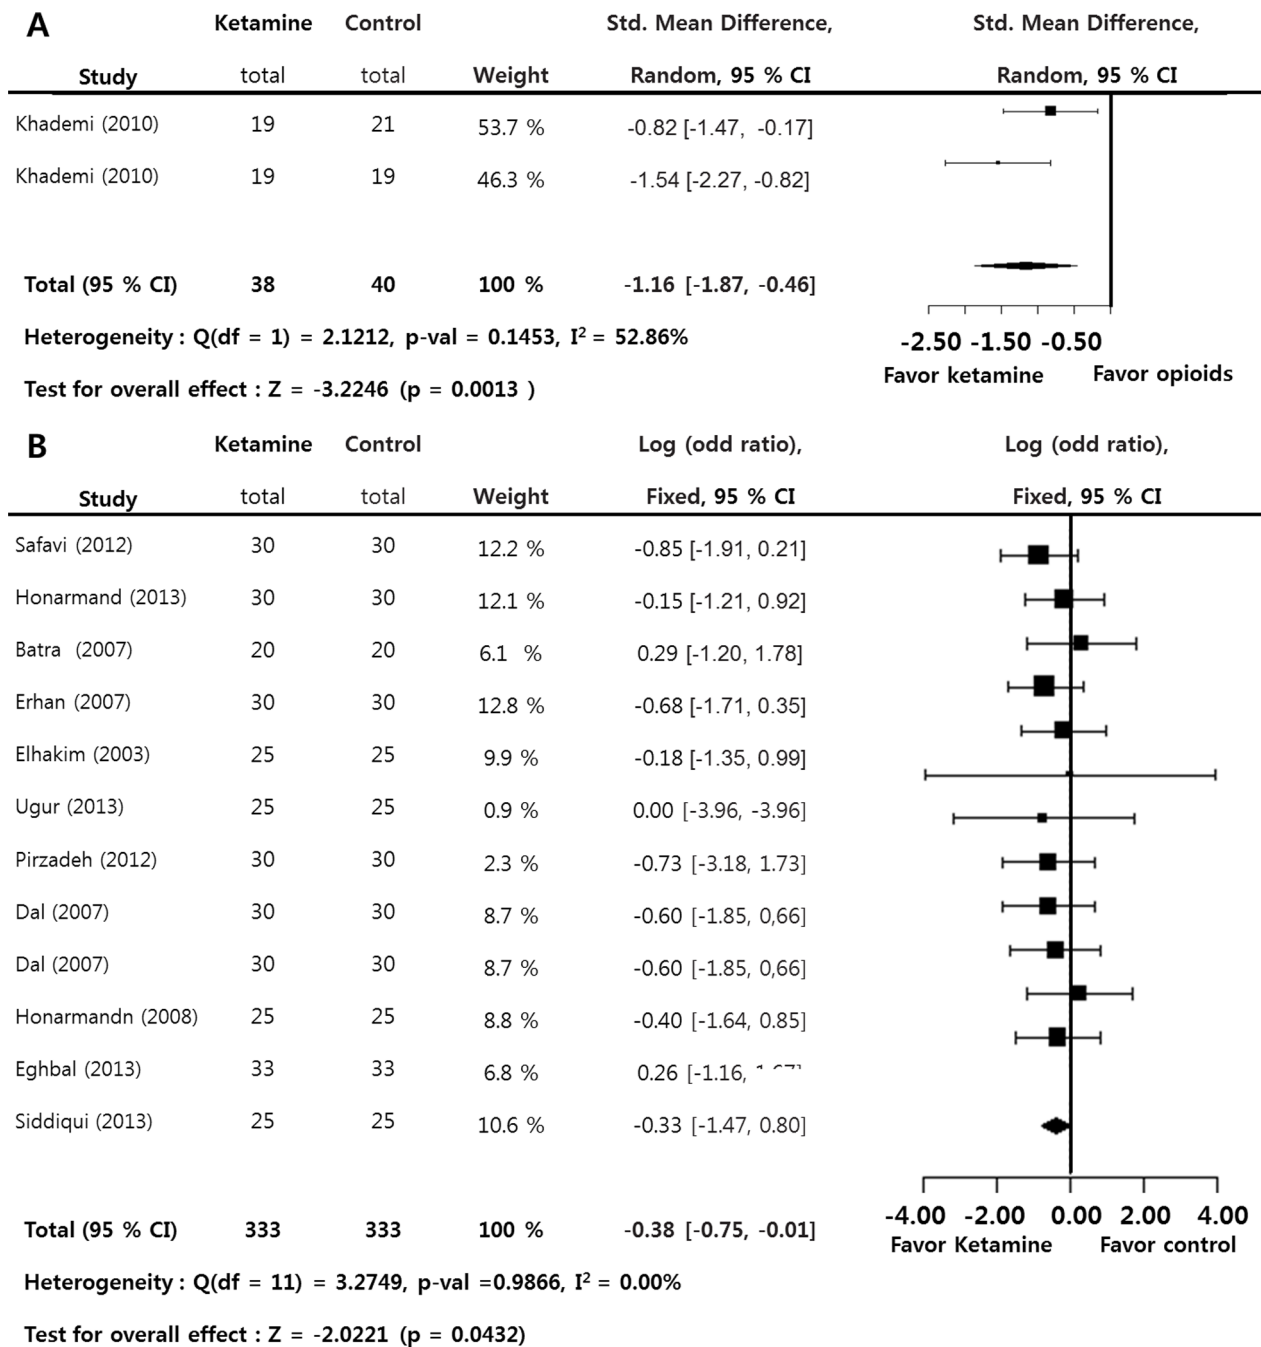

**Figure 5. Preoperative ketamine versus control.** Standard mean difference of amounts of antiemesis requirements (A) and odd ratio of the incidence of postoperative nausea and vomiting (B) (total : number of participants per group). doi:10.1371/journal.pone.0101259.g005

problems with the analysis used in this review. Dahmani et al. [32] performed an analysis of pain scores via the division of postoperative periods (0–24 hours) into two simple categories - postoperative care unit (PACU) stay (the first 2 hours) and the early postoperative period (between 6 and 24 hours) defined based on individual study results. However, because most of studies measured these values every approximately 2–3 hours, even 15 or 30 minutes, several time-dependent values could be included per single category. Therefore, the selection of one from several measured values without criteria of selection may have cause selection bias that could not reflect the typical values in the

category. Additionally, the most annoying limitations of ketamine are its adverse psycho-mimetic effects, including dizziness, depersonalization, frightening dreams and hallucinations, although these are not common in low doses [3]. A previous study performed a meta-analysis of the efficacy of ketamine on postoperative pain without adverse effects [32].

In this study, we used more detailed time category to maximize the data included in the meta-analysis and to more precisely evaluate the time dependent change of the effect of ketamine on postoperative pain. We also assessed adverse effects for a comparison between ketamine and control groups. Additionally,

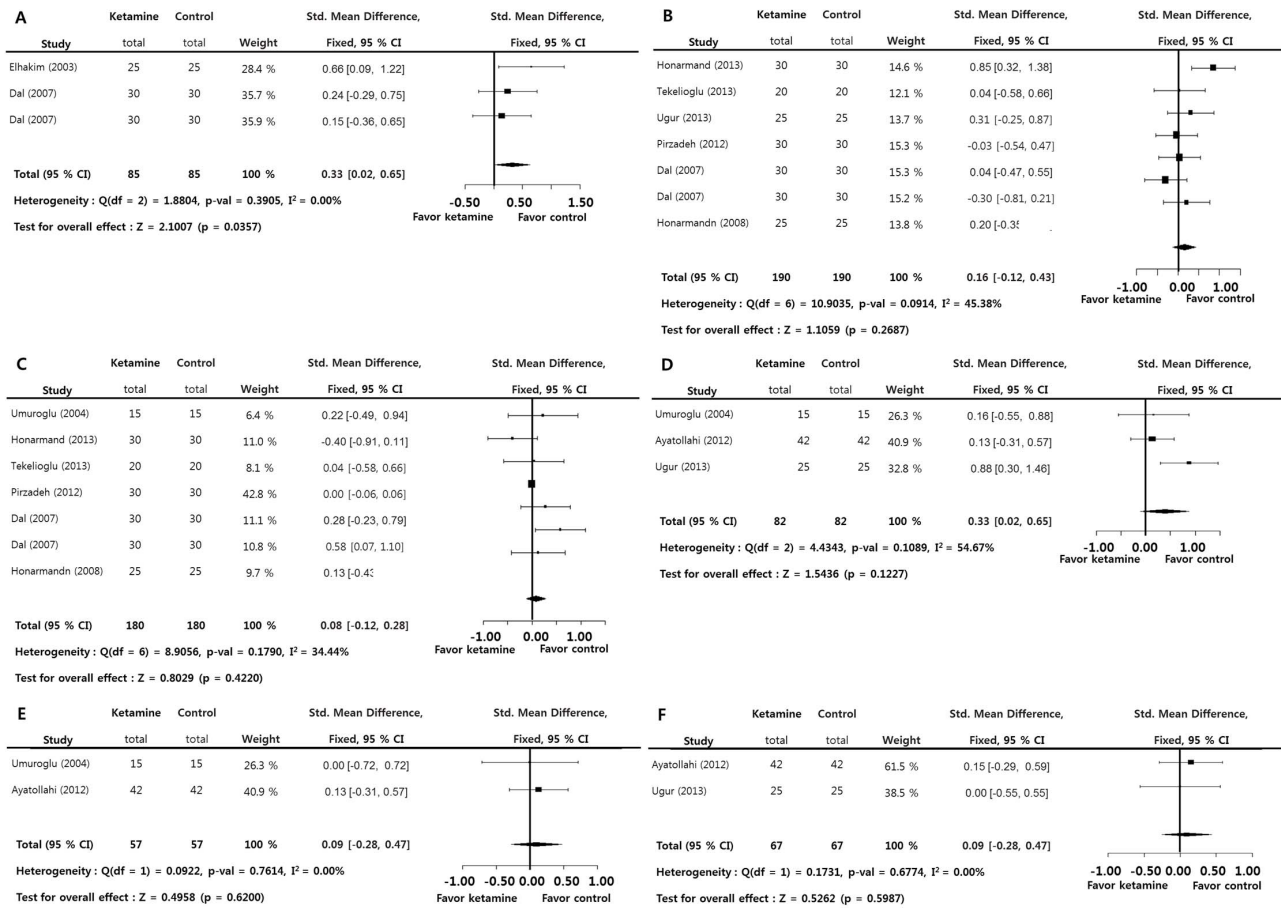

**Figure 6. Preoperative ketamine versus control.** Standard mean difference of the time to awake (A) and standard mean difference of the degree of sedation at 0 (B), 1 (C), 4 (D), 6 (E), and 12 (F) from leaving operation room (total : number of participants per group). doi:10.1371/journal.pone.0101259.g006

ketamine at subanesthetic doses can prevent central hypersensitivity caused by pain [2]. Most of the studies evaluated the efficacy of preoperative systemic or local administration on the pain control after tonsillectomy. Therefore, this study included studies with narrow inclusion criteria (preoperative systemic or local administration methods and low dosage prior to the tonsillectomy).

Our results showed that the postoperative pain in the early postoperative period (0–4 hours) and frequency and amounts of analgesic intake during 0–24 hours postoperatively were statistically decreased in the ketamine group compared with the control group and the time to first analgesic administration was significantly longer in the ketamine group than the control group. Moreover, the SMD for the measurements regarding the pain and analgesics intake usually exceeded 0.8, which meant that these effect sizes were clinically significant during postoperative periods [33]. Considering the amounts of analgesics intake used as the objective criterion for the assessment of pain and pain scales reported by clinicians are reliable measure of pain for children according to age group, preoperative administration of ketamine after tonsillectomy considerably influenced postoperative pain and could reduce analgesic requirements.

The opioids injections are most commonly used to manage most patients after tonsillectomy, based on the simplicity and practical applicability of the technique [3,25]. However, many children who underwent tonsillectomy to treat the obstructive sleep apnea may be sensitive to opioids, causing significant respiratory problems. It

has been recommended that opioids be used with extreme caution and only short acting ones should be used if necessary [23]. Therefore, we also compared the analgesic effect of ketamine and opioids after tonsillectomy among children. There was no statistically significant difference between postoperative pain and frequency and amounts of analgesics intake during the 24-hour postoperative period. Considering that ketamine has less effect on airway patency and respiratory drive, these results indicated that ketamine might be an ideal choice in children with sleep apnea.

The incidence of adverse effects, such as sedation, sleep pattern change, dreaming, and hallucination, has limited the use of ketamine in anesthetic dose [23]. In this meta-analysis, the incidence of bad dreams, sleep pattern change or hallucinations in the ketamine group was low, and the degree of sedation as well as incidences of adverse events were similar with the control group, in accordance with previous data when low dose ketamine was used during anesthesia [3]. These results could suggest that the effects of low ketamine are relatively unimportant in the adverse effects. By contrast, there was low incidence of postoperative nausea and vomiting and decreased antiemetic prescriptions in the ketamine group in comparison to the control group. Previous studies have indicated that vomiting, which is induced by swallowed blood and oropharyngeal irritation, occurs in 40–65% of children after tonsillectomy. The administration of opioids has an additive effect on the incidence of nausea and vomiting [4] but ketamine has no additional emetogenic effect [12]. These facts could explain the

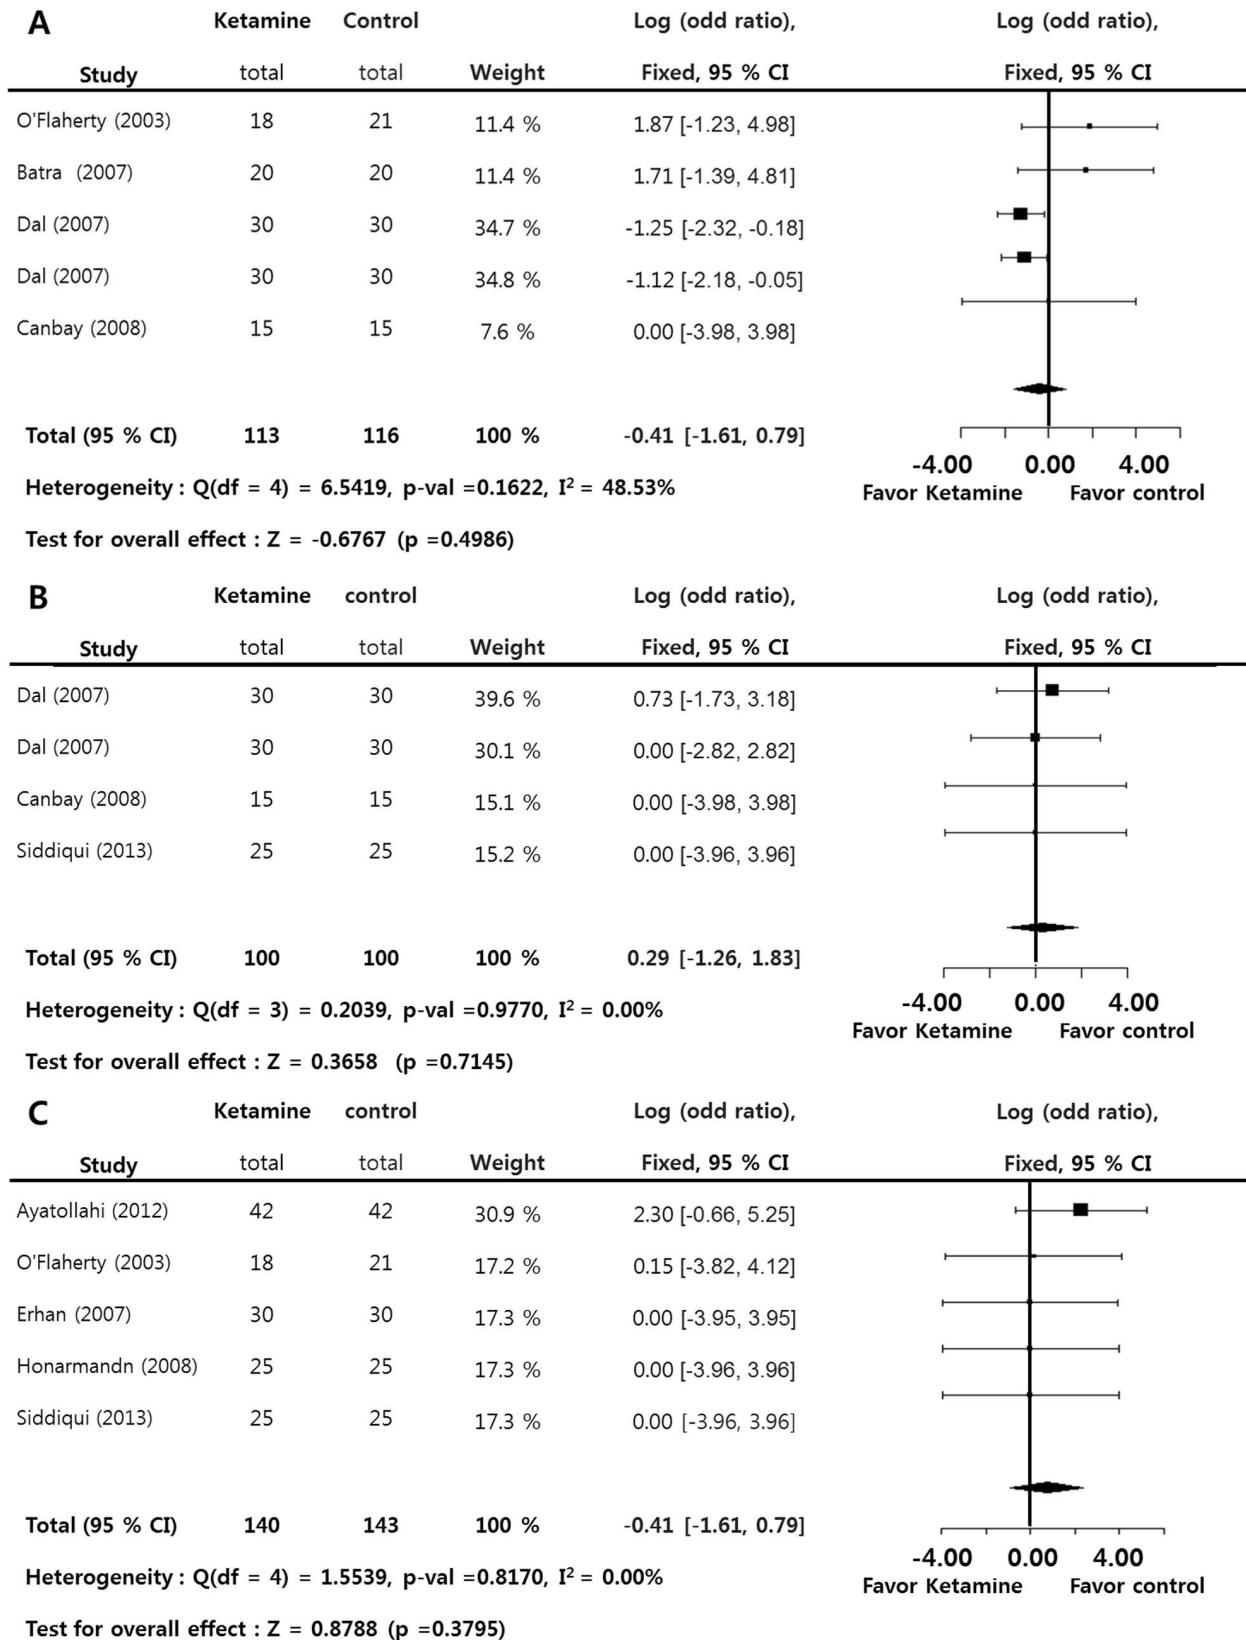

**Figure 7. Preoperative ketamine versus control.** Odd ratio of the incidence of worse sleep pattern change (A), bad dream (B), and hallucination (C) (total : number of participants per group). doi:10.1371/journal.pone.0101259.g007

positive effect of ketamine on emesis because of effective pain control and reduced analgesic requirements, including opioids.

The adverse effects of ketamine include increased production of salivary and tracheobronchial secretions as well as nausea, vomiting, and psycho-mimetic manifestations. In particular, increased secretions and stimulation of the posterior pharynx by suction instruments could cause the laryngospasm which would be considered to be the most feared complication of ketamine administration, although this event is rarely observed [34]. Therefore anti-sialagogues such as atropine and glycopyrrolate had been recommended as a routine adjunct [35]. However, all episodes of laryngospasm essentially always have been transient and responded quickly to assisted ventilation and oxygen. In large case series of Epstein et al., no difficulty occurred in 1100 children who received ketamine without atropine [34]. Recently, large meta-analysis demonstrated that ketamine-associated transient laryngospasm and hypersalivation were relatively uncommon (0.3% incidence in children) and rare in anesthetic dose. Therefore, Green et al. suggested that routine prophylactic anti-sialagogues no longer recommended because of doubtful clinical importance [36]. In addition, low-dose ketamine can reduce its side-effects such as salivary and bronchial secretions [37]. Because of these facts, we could not find a controlled study of pediatric tonsillectomy assessing airway related problems, including laryngospasm or hypersalivation, when administered with ketamine in the sub-anesthetic doses discussed here and could not perform the review on the ketamine-caused respiratory adverse effects via pooled data.

Subgroup analyses (systemic and local administration) regarding pain scores was applied to decrease the heterogeneity and to identify factors influencing the results. Systemic and local administrations of ketamine were effective in postoperative pain control. Preoperative ketamine administration through the intravenous and peritonsillar infiltration both reduce the incidence and severity of postoperative pain as well as the need for analgesics in children undergoing tonsillectomy. However, peritonsillar infiltration was more effective in reducing the pain severity and need for analgesics [13]. In particular, despite being statistically insignificant, peritonsillar infiltration of ketamine showed a large effect size ( $>0.8$ ) during the late postoperative period (6–24 hours). These results were somewhat different from the results of Dahmani et al. [32] in that locally administered ketamine during tonsillectomy decreased both PACU (0–2 hours) and early (6–24 hours) postoperative pain. This discrepancy may reflect that our study used more detailed time categories and included more studies than the previous study [32].

Despite subgroup analyses, it was not possible to decrease the heterogeneity for the local administration of ketamine. Addition-

ally local administration showed different effect from systemic administration in this study. There would be three reasons. Firstly, ketamine has peripheral and central effects. During peritonsillar infiltration, ketamine exerts local analgesic effect by blockade of sodium and potassium channels in the peripheral nerve (tonsillar nerve) as well as an anti-hyperalgesic effect. Secondly, the local anaesthetic effect of ketamine is more than 90 minutes and lasts for 1 week after infiltration in comparison with systemic pharmacokinetic with maximum plasma concentrations occurring 20–30 minutes after a dose of ketamine (0.5 mg/kg) and elimination half-life of 155 minutes [18,28]. Thirdly, one factor that might have caused the high heterogeneity was the variability of the peripheral nerve block by different clinicians [32].

Although the results of this study offer evidence for the use of preoperative ketamine at low dose in ameliorating patient's morbidity, the efficacy of ketamine when coadministered with opioid agents or when administered continuously during tonsillectomy remains unclear, as a meta-analysis comparing these particular factors has yet to be conducted. Additionally, assessing and reporting on the effects of other agents would also be useful to understand their potential impact on morbidity associated with tonsillectomy.

## Conclusion

This meta-analysis demonstrates that local or systemic administration of ketamine before tonsillectomy in children can decrease post tonsillectomy pain efficiently without adverse effect such as nausea and vomiting, sedation, bad dreams, sleep pattern change or hallucinations. It can also decrease analgesic consumption and the time to the beginning of oral liquid diet. In particular local administration of ketamine was more effective in reducing the postoperative pain severity and need for analgesics.

## Supporting Information

**Checklist S1** PRISMA Checklist.  
(DOC)

**File S1** The list of articles excluded from this study with the reasons.  
(DOC)

## Author Contributions

Conceived and designed the experiments: HKC SHH. Performed the experiments: HKC KWK YMJ HSL. Analyzed the data: HKC YMJ YJL SHH. Contributed reagents/materials/analysis tools: KWK YMJ YJL HSL SHH. Contributed to the writing of the manuscript: HKC SHH.

## References

- Bameshki AR, Razban M, Khadivi E, Razavi M, Bakhshae M (2013) The Effect of Local Injection of Epinephrine and Bupivacaine on Post-Tonsillectomy Pain and Bleeding. *Iran J Otorhinolaryngol* 25: 209–214.
- Safavi M, Honarmand A, Habibabady MR, Baraty S, Aghadavoudi O (2012) Assessing intravenous ketamine and intravenous dexamethasone separately and in combination for early oral intake, vomiting and postoperative pain relief in children following tonsillectomy. *Med Arh* 66: 111–115.
- Hasnain F, Janbaz KH, Qureshi MA (2012) Analgesic effect of ketamine and morphine after tonsillectomy in children. *Pak J Pharm Sci* 25: 599–606.
- Umuroglu T, Eti Z, Ciftci H, Yilmaz Gogus F (2004) Analgesia for adenotonsillectomy in children: a comparison of morphine, ketamine and tramadol. *Paediatr Anaesth* 14: 568–573.
- Ayatollahi V, Behdad S, Hatami M, Moshtaghiun H, Baghianimoghdam B (2012) Comparison of peritonsillar infiltration effects of ketamine and tramadol on post tonsillectomy pain: a double-blinded randomized placebo-controlled clinical trial. *Croat Med J* 53: 155–161.
- DA Conceicao MJ, Bruggemann DACD, Carneiro Leao C (2006) Effect of an intravenous single dose of ketamine on postoperative pain in tonsillectomy patients. *Paediatr Anaesth* 16: 962–967.
- Hozo SP, Djulbegovic B, Hozo I (2005) Estimating the mean and variance from the median, range, and the size of a sample. *BMC Med Res Methodol* 5: 13.
- Honarmand A, Safavi MR, Jamshidi M (2008) The preventative analgesic effect of preincisional peritonsillar infiltration of two low doses of ketamine for postoperative pain relief in children following adenotonsillectomy. A randomized, double-blind, placebo-controlled study. *Paediatr Anaesth* 18: 508–514.
- Dal D, Celebi N, Elvan EG, Celiker V, Aypar U (2007) The efficacy of intravenous or peritonsillar infiltration of ketamine for postoperative pain relief in children following adenotonsillectomy. *Paediatr Anaesth* 17: 263–269.
- Canbay O, Celebi N, Uzun S, Sahin A, Celiker V, et al. (2008) Topical ketamine and morphine for post-tonsillectomy pain. *Eur J Anaesthesiol* 25: 287–292.
- Tekelioglu UY, Apuhan T, Akkaya A, Demirhan A, Yildiz I, et al. (2013) Comparison of topical tramadol and ketamine in pain treatment after tonsillectomy. *Paediatr Anaesth* 23: 496–501.
- Batra YK, Shamsah M, Al-Khasti MJ, Rawdhan HJ, Al-Qattan AR, et al. (2007) Intraoperative small-dose ketamine does not reduce pain or analgesic consumption during perioperative opioid analgesia in children after tonsillectomy. *Int J Clin Pharmacol Ther* 45: 155–160.

13. Khademi S, Ghaffarpasand F, Heiran HR, Yavari MJ, Motazedian S, et al. (2011) Intravenous and peritonsillar infiltration of ketamine for postoperative pain after adenotonsillectomy: a randomized placebo-controlled clinical trial. *Med Princ Pract* 20: 433–437.
14. Elhakim M, Khalafallah Z, El-Fattah HA, Farouk S, Khatib A (2003) Ketamine reduces swallowing-evoked pain after paediatric tonsillectomy. *Acta Anaesthesiol Scand* 47: 604–609.
15. Ugur KS, Karabayirli S, Demircioglu RI, Ark N, Kurtaran H, et al. (2013) The comparison of preincisional peritonsillar infiltration of ketamine and tramadol for postoperative pain relief on children following adenotonsillectomy. *Int J Pediatr Otorhinolaryngol* 77: 1825–1829.
16. Eghbal MH, Taregh S, Amin A, Sahmeddini MA (2013) Ketamine improves postoperative pain and emergence agitation following adenotonsillectomy in children. A randomized clinical trial. *Middle East J Anesthesiol* 22: 155–160.
17. Pirzadeh A, Mohammadi MA, Allaf-Akbari S, Entezariasl M (2012) The effect of ketamine on posttonsillectomy pain in children: a clinical trial. *Iran J Otorhinolaryngol* 24: 23–28.
18. Siddiqui AS, Raees US, Siddiqui SZ, Raza SA (2013) Efficacy of pre-incisional peritonsillar infiltration of ketamine for post-tonsillectomy analgesia in children. *J Coll Physicians Surg Pak* 23: 533–537.
19. O'Flaherty JE, Lin CX (2003) Does ketamine or magnesium affect post-tonsillectomy pain in children? *Paediatr Anaesth* 13: 413–421.
20. Levanen J (2000) Ketamine and oxycodone in the management of postoperative pain. *Mil Med* 165: 450–455.
21. El Sonbaty MI, Abo el Dahab H, Mostafa A, Abo Shanab O (2011) Preemptive peritonsillar ketamine infiltration: postoperative analgesic efficacy versus meperidine. *Middle East J Anesthesiol* 21: 43–51.
22. Taheri R, Seyedhejazi M, Ghojzadeh M, Ghabili K, Shayeghi S (2011) Comparison of ketamine and fentanyl for postoperative pain relief in children following adenotonsillectomy. *Pak J Biol Sci* 14: 572–577.
23. Marcus RJ, Victoria BA, Rushman SC, Thompson JP (2000) Comparison of ketamine and morphine for analgesia after tonsillectomy in children. *Br J Anaesth* 84: 739–742.
24. Honarmand A, Safavi M, Kashefi P, Hosseini B, Badiei S (2013) Comparison of effect of intravenous ketamine, peritonsillar infiltration of tramadol and their combination on pediatric posttonsillectomy pain: A double-blinded randomized placebo-controlled clinical trial. *Res Pharm Sci* 8: 177–183.
25. Erhan OL, Goksu H, Alpay C, Bestas A (2007) Ketamine in post-tonsillectomy pain. *Int J Pediatr Otorhinolaryngol* 71: 735–739.
26. Aspinall RL, Mayor A (2001) A prospective randomized controlled study of the efficacy of ketamine for postoperative pain relief in children after adenotonsillectomy. *Paediatr Anaesth* 11: 333–336.
27. Genc E, Hanci D, Ergin NT, Dal T (2006) Can mucosal sealing reduce tonsillectomy pain? *Int J Pediatr Otorhinolaryngol* 70: 725–730.
28. Elshammaa N, Chidambaran V, Housny W, Thomas J, Zhang X, et al. (2011) Ketamine as an adjunct to fentanyl improves postoperative analgesia and hastens discharge in children following tonsillectomy - a prospective, double-blinded, randomized study. *Paediatr Anaesth* 21: 1009–1014.
29. Ozlugedik S, Genc S, Unal A, Elhan AH, Tezer M, et al. (2006) Can postoperative pains following tonsillectomy be relieved by honey? A prospective, randomized, placebo controlled preliminary study. *Int J Pediatr Otorhinolaryngol* 70: 1929–1934.
30. Hamunen K, Kontinen V (2005) Systematic review on analgesics given for pain following tonsillectomy in children. *Pain* 117: 40–50.
31. Laskowski K, Stirling A, McKay WP, Lim HJ (2011) A systematic review of intravenous ketamine for postoperative analgesia. *Can J Anaesth* 58: 911–923.
32. Dahmani S, Michelet D, Abback PS, Wood C, Brasher C, et al. (2011) Ketamine for perioperative pain management in children: a meta-analysis of published studies. *Paediatr Anaesth* 21: 636–652.
33. Acion L, Peterson JJ, Temple S, Arndt S (2006) Probabilistic index: an intuitive non-parametric approach to measuring the size of treatment effects. *Stat Med* 25: 591–602.
34. Epstein FB (1993) Ketamine dissociative sedation in pediatric emergency medical practice. *Am J Emerg Med* 11: 180–182.
35. Mistry RB, Nahata MC (2005) Ketamine for conscious sedation in pediatric emergency care. *Pharmacotherapy* 25: 1104–1111.
36. Green SM, Roback MG, Kennedy RM, Krauss B (2011) Clinical practice guideline for emergency department ketamine dissociative sedation: 2011 update. *Ann Emerg Med* 57: 449–461.
37. McGlone RG, Howes MC, Joshi M (2004) The Lancaster experience of 2.0 to 2.5 mg/kg intramuscular ketamine for paediatric sedation: 501 cases and analysis. *Emerg Med J* 21: 290–295.
